# Supplementary material for: A highly sensitive water-soluble system to sense glucose in aqueous solution
Source: Royal Society of Chemistry journal article supplement (doi:10.1039/c0ob01224f), 2011-01-01
Supplement: c0ob01224f.pdf [file c0ob01224f.pdf]

## Highly Sensitive Water-soluble System to Sense Glucose in Aqueous Solution

Liheng Feng,<sup>\*a</sup> Fei Liang,<sup>a</sup> Yue Wang,<sup>a</sup> Ming Xu,<sup>a</sup> and Xiaoju Wang<sup>\*b</sup>

<sup>a</sup>*School of Chemistry and Chemical Engineering, Shanxi University, Taiyuan 030006, P.R. China*

<sup>b</sup>*Institute of Molecular Science, Chemical Biology and Molecular Engineering, Laboratory of Education Ministry, Shanxi University, Taiyuan, 030006, P.R. China*

### Electronic Supplementary Information (ESI†)

|                 |                                                                                                                            |    |
|-----------------|----------------------------------------------------------------------------------------------------------------------------|----|
| <b>Fig. S1</b>  | Stern-Volmer plot of PP-S-BINOL quenching by <i>o</i> -BBV in the present of glucose (100 mM)                              | 2  |
| <b>Fig. S2</b>  | The amplified fluorescence quenching of PP-S-BINOL and <i>o</i> -BBV with the addition of glucose                          | 3  |
| <b>Fig. S3</b>  | The colour change of PP-S-BINOL/ <i>o</i> -BBV system followed by glucose 50.0 mM                                          | 4  |
| <b>Fig. S4</b>  | The <sup>1</sup> H NMR of 1,4-dibromo-2,5-bis(3-sulfonatopropoxy)benzene                                                   | 5  |
| <b>Fig. S5</b>  | The <sup>13</sup> C NMR of 1,4-dibromo-2,5-bis(3-sulfonatopropoxy)benzene                                                  | 6  |
| <b>Fig. S6</b>  | The <sup>1</sup> H NMR of ( <i>S</i> )-2,2'-dimethoxy-6,6'-bis-(4,4,5,5-tetramethyl-1,3,2-dioxaborolane)-1,1'-naphthalene  | 7  |
| <b>Fig. S7</b>  | The <sup>13</sup> C NMR of ( <i>S</i> )-2,2'-dimethoxy-6,6'-bis-(4,4,5,5-tetramethyl-1,3,2-dioxaborolane)-1,1'-naphthalene | 8  |
| <b>Fig. S8</b>  | The <sup>1</sup> H NMR of PP-S-BINOL                                                                                       | 9  |
| <b>Fig. S9</b>  | The <sup>13</sup> C NMR of PP-S-BINOL                                                                                      | 10 |
| <b>Fig. S10</b> | The <sup>1</sup> H NMR of <i>o</i> -BBV                                                                                    | 11 |
| <b>Fig. S11</b> | The <sup>13</sup> C NMR of <i>o</i> -BBV                                                                                   | 12 |

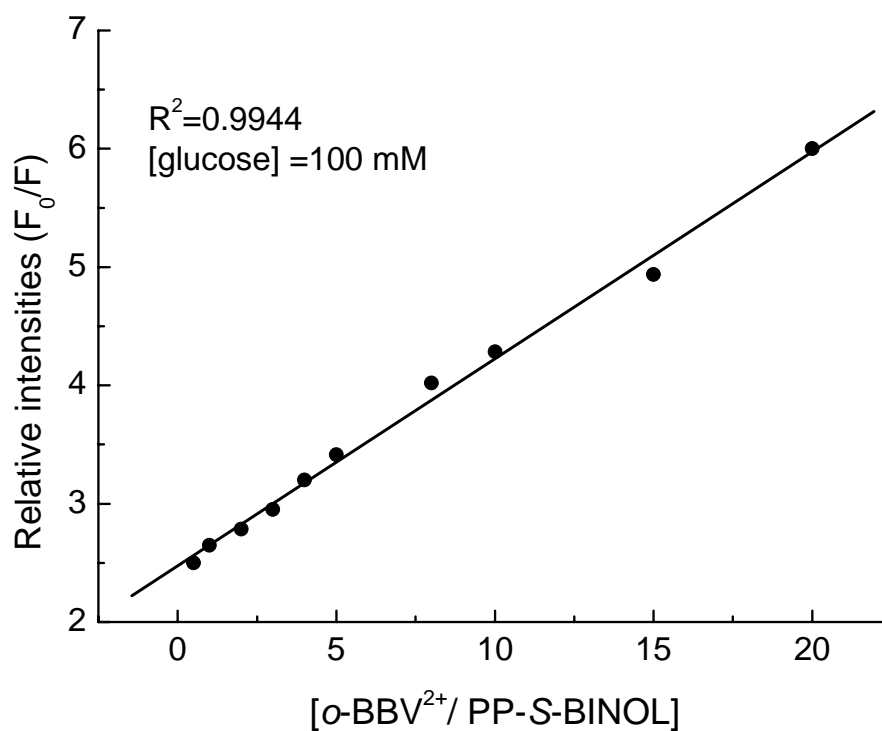

**Fig. S1** Stern-Volmer plot of PP-S-BINOL ( $4.0 \times 10^{-6}$  M) quenching by *o*-BBV in the present of glucose (100 mM) at pH 7.4. The molarity of PP-S-BINOL was calculated according to the minimum structure unit of polymer.

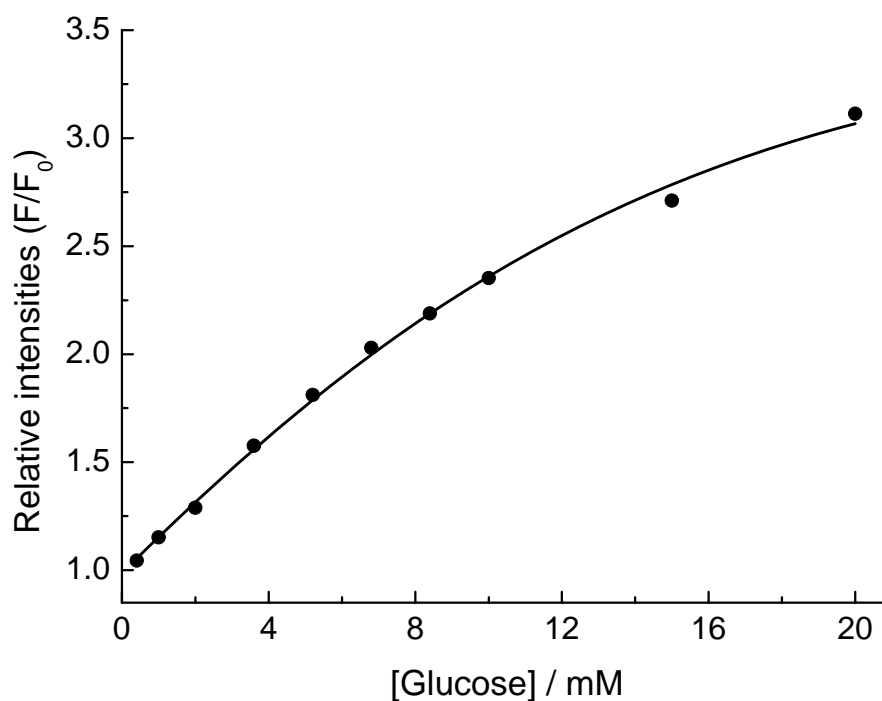

**Fig. S2** The amplified fluorescence quenching of PP-S-BINOL ( $4.0 \times 10^{-6}$  M) and *o*-BBV ( $4.0 \times 10^{-5}$  M) with the addition of glucose in pH 7.4 phosphate buffer solution. The molarity of PP-S-BINOL was calculated according to the minimum structure unit of polymer.

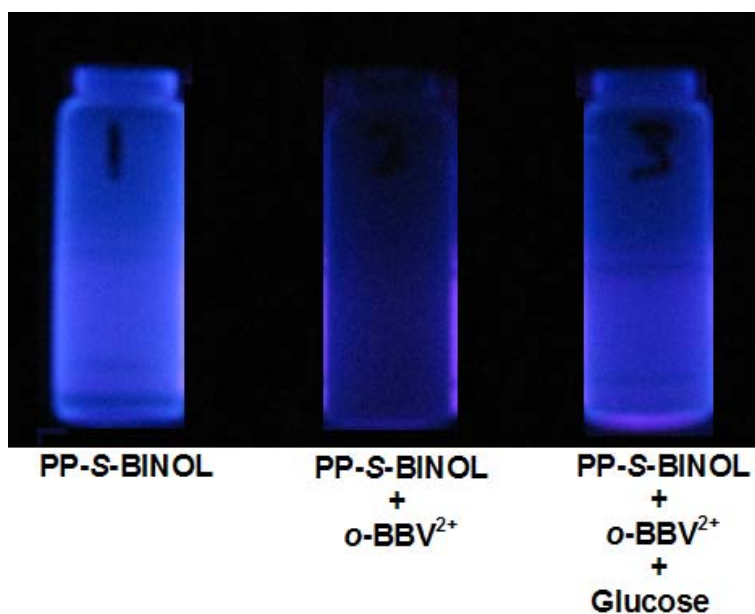

**Fig. S3** The colour change of PP-S-BINOL ( $2.0 \times 10^{-4}$  M) solution by introduction of o-BBV ( $2.0 \times 10^{-4}$  M) followed by glucose 50.0 mM in pH 7.4 phosphate buffer solution. The solutions were irradiated by  $\lambda 365$  nm UV-Vis light.

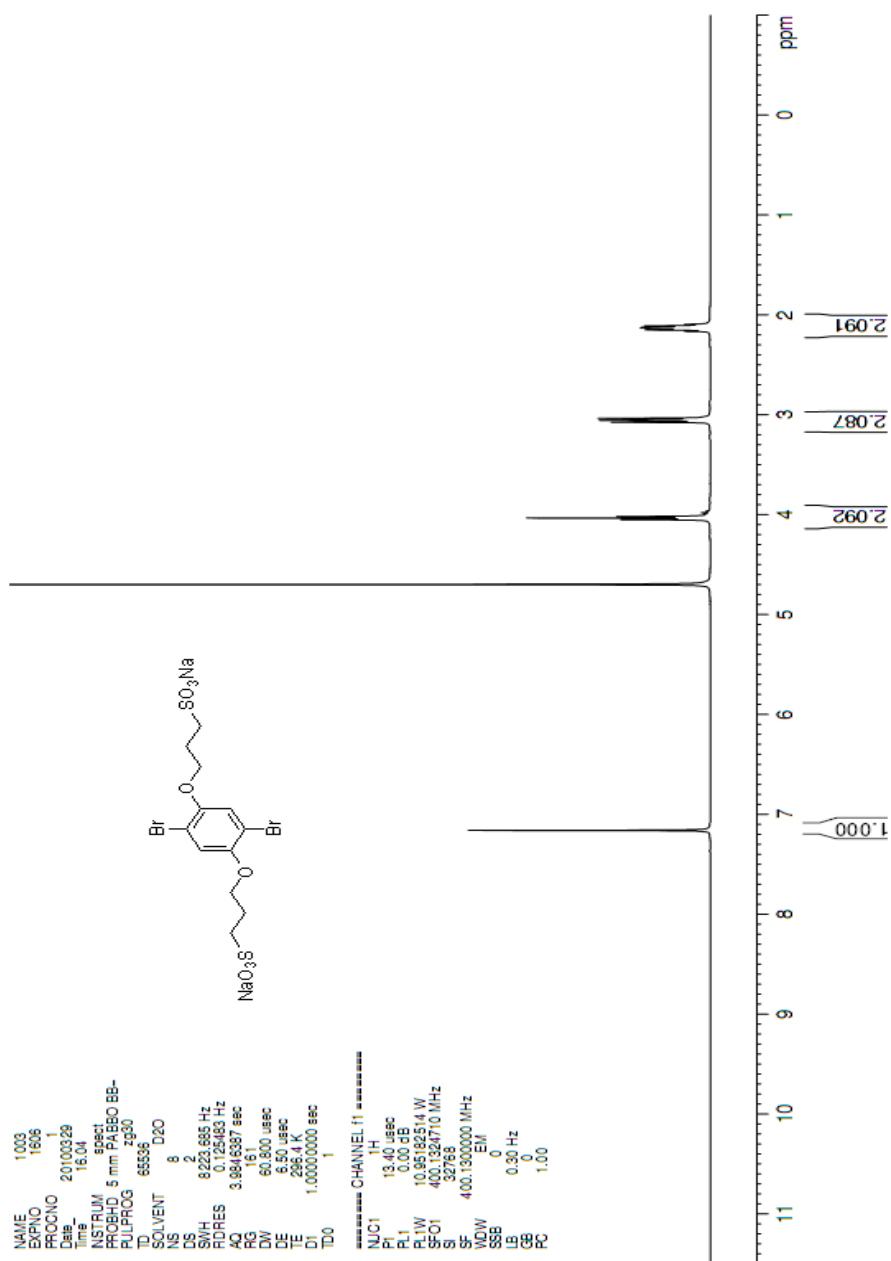

**Fig. S4** 400 MHz <sup>1</sup>H NMR of 1,4-dibromo-2,5-bis(3-sulfonatopropoxy)benzene in D<sub>2</sub>O.

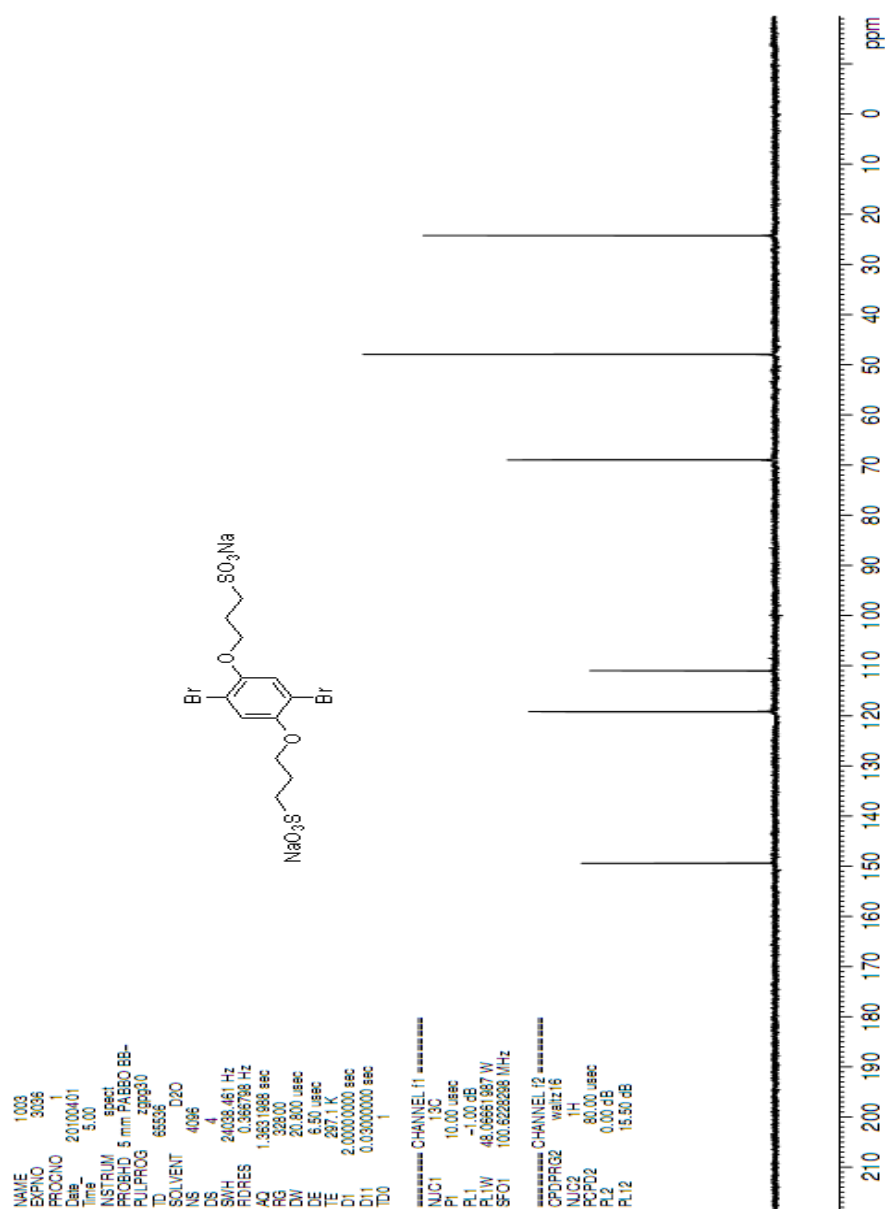

**Fig. S5** 100 MHz <sup>13</sup>C NMR of 1,4-dibromo-2,5-bis(3-sulfonato-propoxy)benzene in D<sub>2</sub>O.

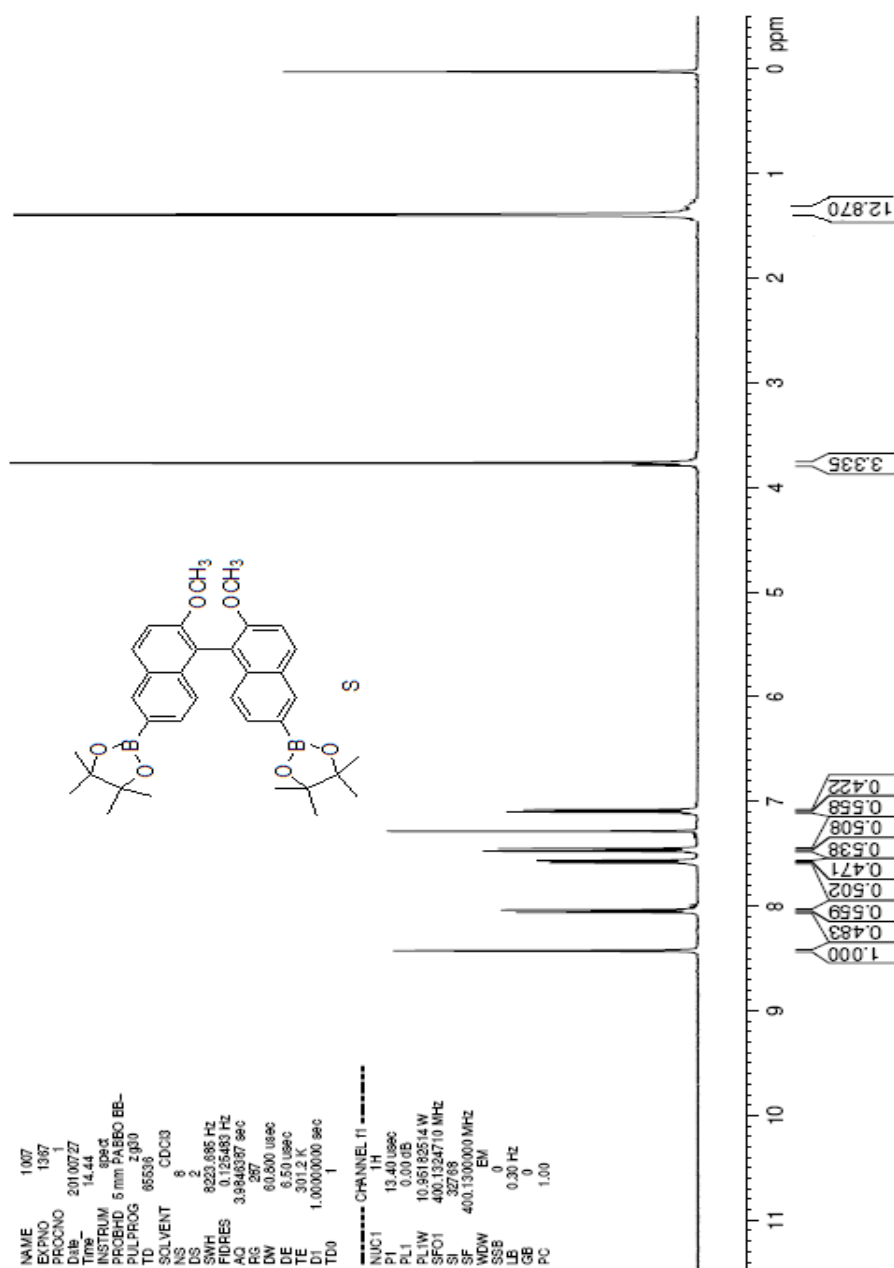

**Fig. S6** 400 MHz  $^1\text{H}$  NMR of (S)-2,2'-dimethoxy-6,6'-bis-(4,4,5,5-tetramethyl-1,3,2-dioxaborolane)-1,1'-naphthalene in  $\text{CDCl}_3$ .

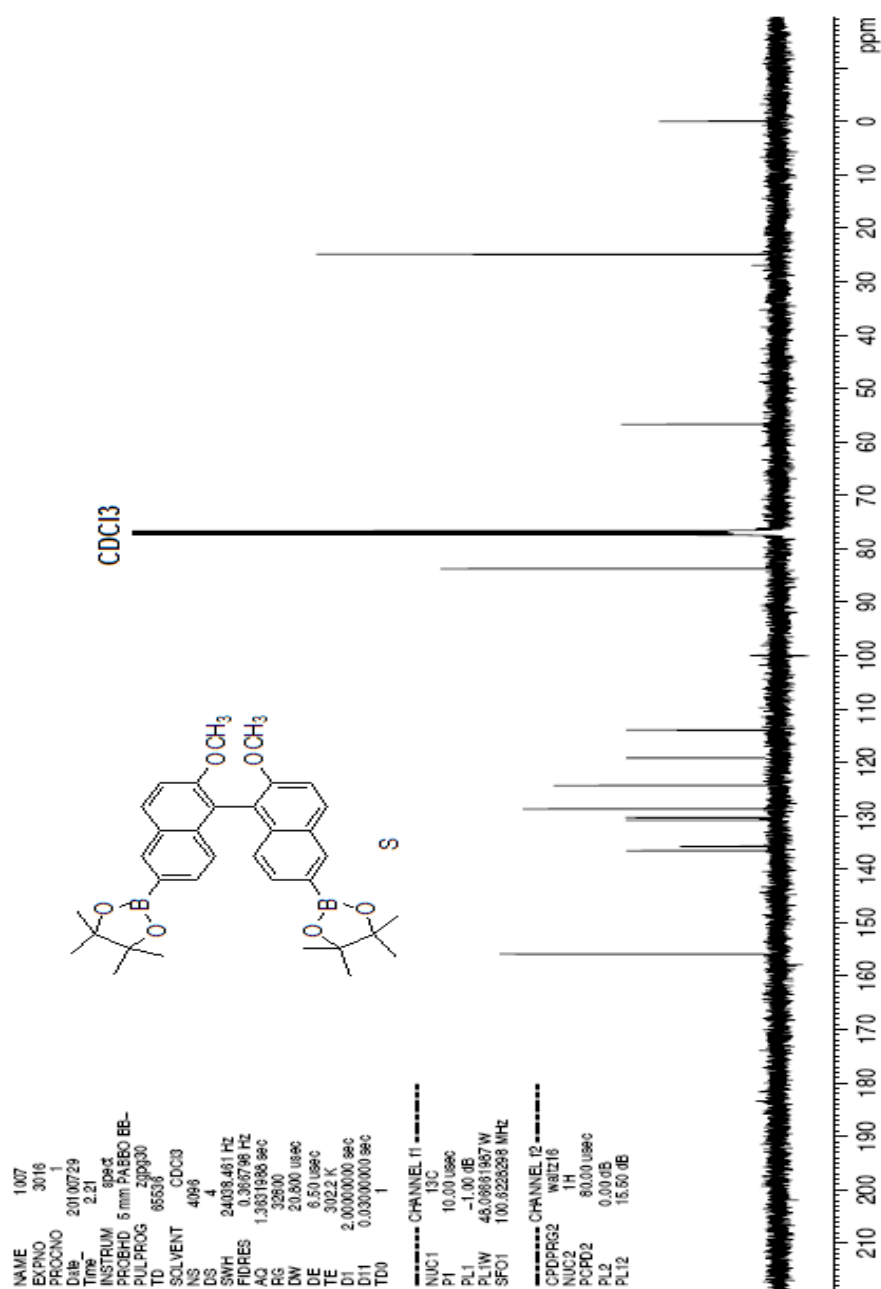

**Fig. S7** 100 MHz  $^{13}\text{C}$  NMR of (S)-2,2'-dimethoxy-6,6'-bis-(4,4,5,5-tetramethyl-1,3,2-dioxaborolane)-1,1'-naphthalene in  $\text{CDCl}_3$ .



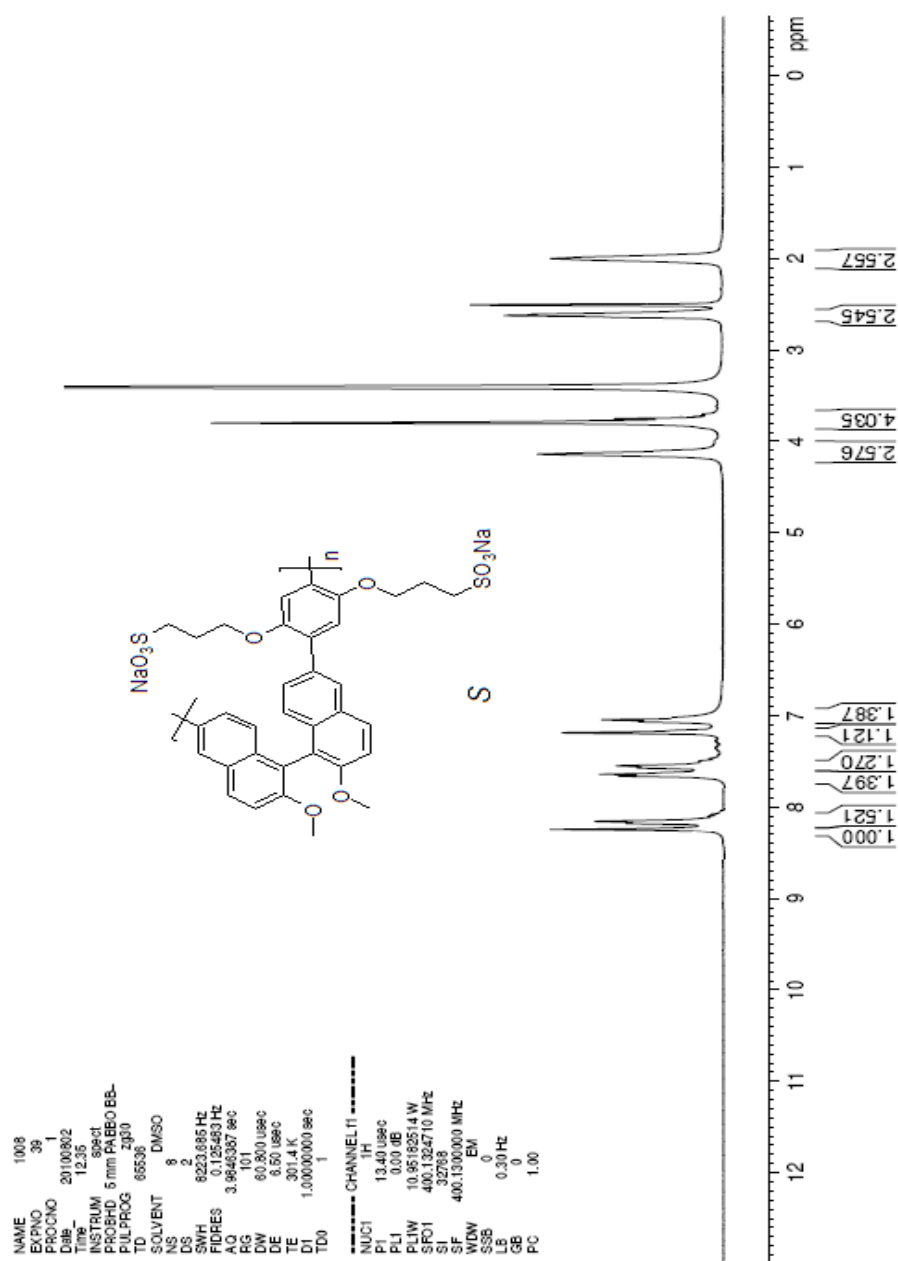

**Fig. S8** 400 MHz  $^1\text{H}$  NMR of PP-S-BINOL in *d*-DMSO.

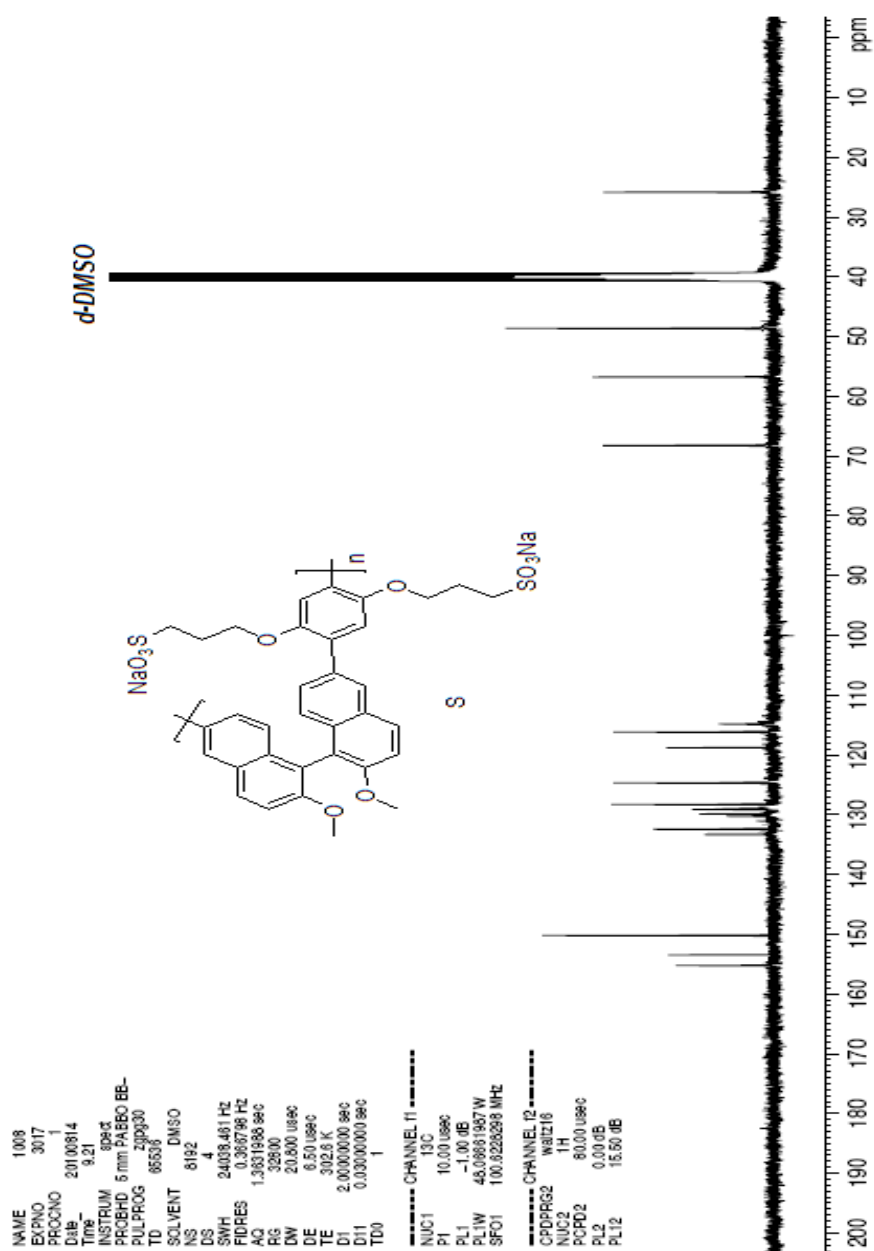

**Fig. S9** 100 MHz <sup>13</sup>C NMR of PP-S-BINOL in *d*-DMSO.

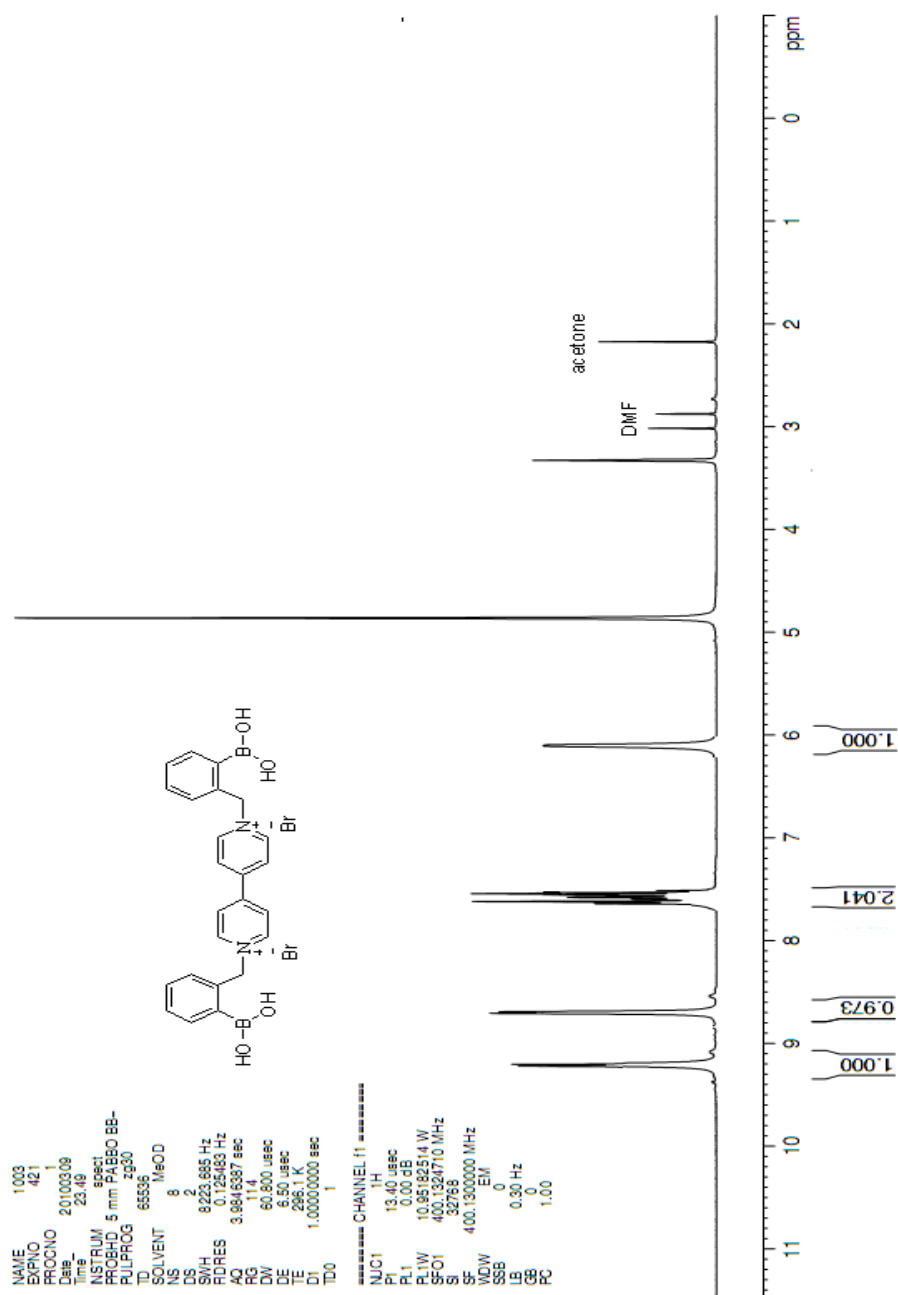

**Fig. S10** 400 MHz  $^1\text{H}$  NMR of *o*-BBV in  $\text{CD}_3\text{OD}$ .

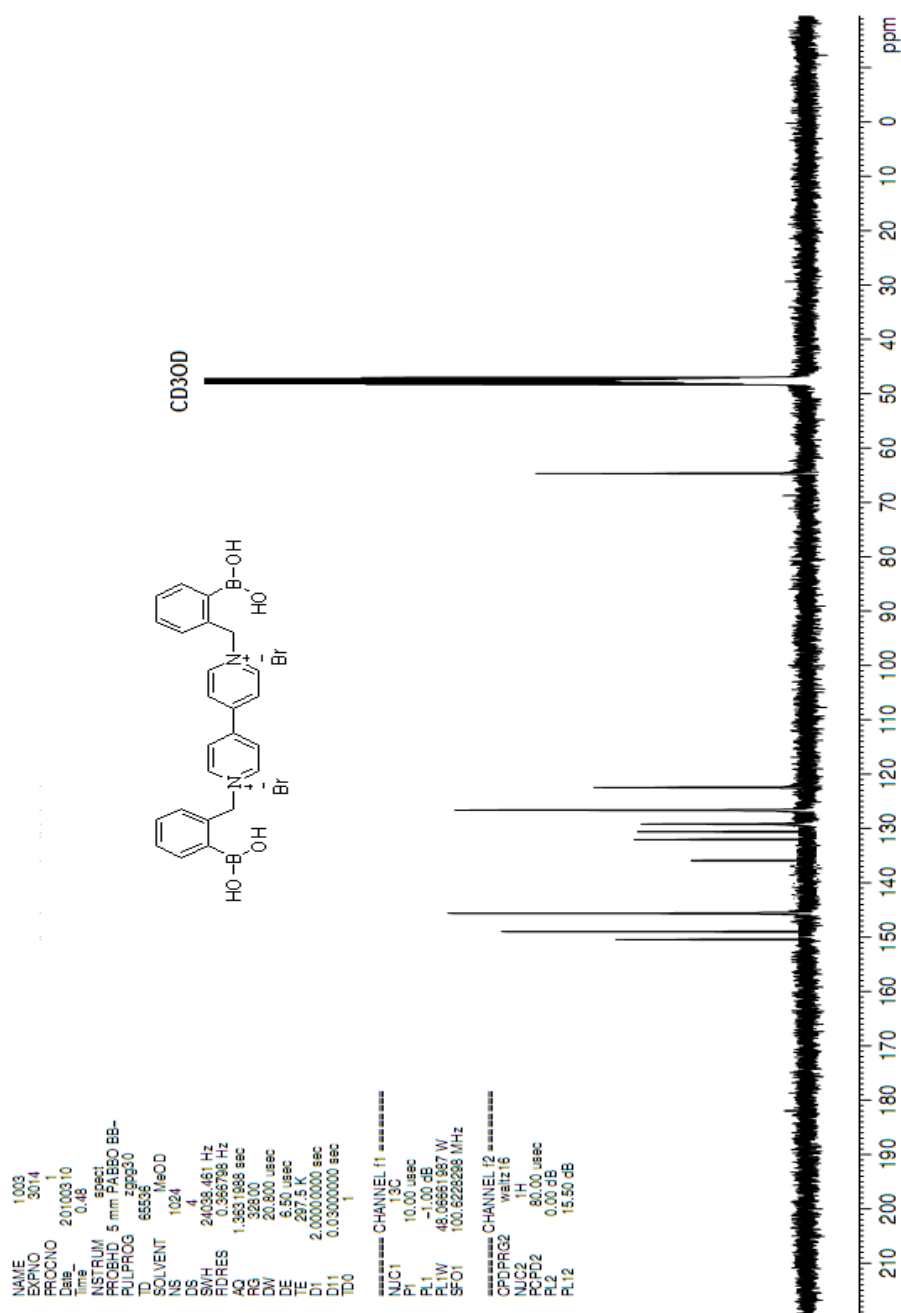

**Fig. S11** 100 MHz <sup>13</sup>C NMR of *o*-BBV in CD<sub>3</sub>OD.
